# 1 Uncovering the microbiome of invasive sympatric European brown hares 2 and European rabbits in Australia

3

4 Somasundhari Shanmuganandam<sup>a,b</sup>, Yiheng Hu<sup>a</sup>, Tanja Strive<sup>b,c</sup>, Benjamin Schwessinger<sup>a#</sup>,  
5 Robyn N. Hall<sup>b,c#</sup>

6 <sup>a</sup>Research School of Biology, The Australian National University, Acton, ACT, Australia

7 <sup>b</sup>CSIRO Health and Biosecurity, Canberra, ACT, Australia

8 <sup>c</sup>Centre for Invasive Species Solutions, Bruce, ACT, Australia

9 #Address correspondence to Robyn Hall, [robyn.hall@csiro.au](mailto:robyn.hall@csiro.au) and/or Benjamin

10 Schwessinger, [benjamin.schwessinger@anu.edu.au](mailto:benjamin.schwessinger@anu.edu.au)

11

## 12 Abstract

13 European brown hares (*Lepus europaeus*) and European rabbits (*Oryctolagus*  
14 *cuniculus*) are invasive pest species in Australia, with rabbits having a substantially larger  
15 environmental impact than hares. As their spatial distribution in Australia partially overlaps,  
16 we conducted a comparative microbiome study to determine how the composition of the  
17 gastrointestinal microbiota varies between these species, since this may indicate species  
18 differences in diet, physiology, and other internal and external factors. We analysed the faecal  
19 microbiome of wild hares and rabbits from a sympatric environment, additionally comparing  
20 Illumina and Nanopore sequencing platforms. The faecal microbiomes varied significantly  
21 between hares and rabbits, despite both species occupying a similar habitat. Moreover, we  
22 identified significantly more variation in faecal microbiome composition between individual  
23 rabbits compared to hares. The faecal microbiome in both species was dominated by the  
24 phyla *Firmicutes* and *Bacteroidetes*, typical of many vertebrates. Many phyla, including

25 *Actinobacteria*, *Proteobacteria*, and *Patescibacteria*, were shared between rabbits and hares.  
 26 In contrast, bacteria from phylum *Verrucomicrobia* were present only in rabbits, while phyla  
 27 *Lentisphaerae* and *Synergistetes* were represented only in hares. We did not identify phylum  
 28 *Spirochetes* in Australian hares; this phylum was previously shown to be present at high  
 29 relative abundance in European hare faecal samples. These differences in the faecal  
 30 microbiota between hares and rabbits in Australia may be associated with differences in diet,  
 31 and potentially behaviour, of the host species in their non-native range, which may influence  
 32 the environmental impacts that these species have in Australia.

33

## 34 **Introduction**

35 In a new environment, non-native species must face several barriers to first invade and  
 36 then become established. They must quickly adapt to new environmental conditions while  
 37 also competing with native species for food, shelter, and water (1, 2). European rabbits  
 38 (*Oryctolagus cuniculus*) and European brown hares (*Lepus europaeus*) are lagomorphs from  
 39 the family *Leporidae* and are both non-native species in Australia, originally introduced from  
 40 Europe in 1859 (3). European rabbits rapidly colonised the entire continent and are  
 41 considered to be one of Australia's worst invasive vertebrate pests due to land degradation  
 42 and competition with native animals and livestock (4-6). Despite foraging over wider areas,  
 43 the impacts of European brown hares are less severe, although they are still considered to be  
 44 a pest species (6, 7). The specific factors underlying differences in colonising potential and  
 45 impacts of each species are likely multifactorial, including differences in host physiology,  
 46 reproductive strategies, behaviour, diet, and interaction with commensal and pathogenic  
 47 microbes.

Recent advancements in sequencing technologies have highlighted the importance of interactions between the gut microbiome, host behaviour and physiology, and dietary preferences (8-13). Although the gastrointestinal microbiome of both rabbits and hares have previously been investigated, most studies to date were conducted on domestic rabbit populations in either Europe or China (14-24). Evaluating the microbial diversity in the gastrointestinal tract of wild hares and rabbits in Australia may provide additional insights as to why European rabbits were such successful colonisers in this environment compared to hares (25). Furthermore, identifying differences between the gastrointestinal microbiota of lagomorphs in their native range compared to their introduced range may lead to novel insights into how to more sustainably manage introduced populations (25).

The microbiome can be investigated through a range of both traditional culture-dependent and less biased culture-independent techniques, including high throughput sequencing (26-31). Among various sequencing strategies, taxonomic profiling based on the 16S ribosomal RNA (rRNA) gene is widely used for estimating the bacterial and archaeal diversity in tissue or environmental samples due to the availability of well-curated databases such as SILVA (32). Broadly, high-throughput sequencing can be classified as either short-read sequencing, using the Illumina platform, or long-read sequencing, using platforms such as PacBio, IonTorrent, or Oxford Nanopore (33, 34). Although all these platforms have previously been used to conduct 16S rRNA microbial profiling studies, direct comparisons of these methods are limited (35).

To investigate the differences between the gastrointestinal microbiome of Australian wild rabbits and hares we conducted 16S rRNA sequencing on faecal samples collected from sympatric populations of these species using both Illumina and Oxford Nanopore sequencing platforms. The gastrointestinal microbial diversity of Australian lagomorphs was then

72 compared to that observed in European populations to explore differences between  
73 populations in their native and invasive ranges.

74

## 75 **Materials and Methods**

### 76 **Sample collection**

77 Faecal samples were collected at necropsy from nine wild European brown hares  
78 (*Lepus europaeus*) and twelve wild European rabbits (*Oryctolagus cuniculus*) of both sexes  
79 (Table S1). The hares and rabbits used in this study were mostly adults or young adults, they  
80 were outwardly healthy, and were shot as part of routine vertebrate pest control operations in  
81 Mulligans Flat, ACT (-35.164, 149.165), between January and September 2016. Mulligans  
82 Flat Nature Reserve comprises 781 hectares of box-gum grassy woodland with a sparse to  
83 moderately dense ground cover of grasses, herbs, and shrubs. The reserve is fenced,  
84 preventing immigration and emigration of most animals. Rabbits and hares were shot from a  
85 vehicle using a 0.22-caliber rifle targeting the head or chest. Faecal pellets from the  
86 descending colon were collected during post-mortem and stored at -20 °C. All sampling was  
87 conducted according to the Australian Code for the Care and Use of Animals for Scientific  
88 Purposes as approved by CSIRO Wildlife and Large Animal Ethics Committee (approvals  
89 #12-15 and #16-02).

### 90 **Genomic DNA extraction**

91 Genomic DNA was extracted from 50 mg of faecal pellets using the DNeasy Blood &  
92 Tissue kit as per manufacturer's instructions and described in detail at  
93 <https://www.protocols.io/view/genomic-dna-extraction-from-animal-faecal-tissues-6bbhain>  
94 (Qiagen, Chadstone Centre, Victoria). Hare and rabbit samples were processed separately,  
95 and reagent-only controls (ROC) were included with each set of extractions. All samples

were quantified and evaluated for integrity using the Qubit dsDNA Broad Range assay kit and the Qubit Fluorometer v2.0 (Thermo Fisher Scientific, Waltham, MA) and Nanodrop ND-1000 (Thermo Fisher Scientific). Genomic DNA samples were stored at  $-20^{\circ}\text{C}$ .

# **Illumina library preparation, sequencing, and bioinformatics analysis**

We amplified the V3-V4 region of the 16S rRNA gene (~ 460 bp) from genomic DNA and ROC according to the Illumina protocol for 16S Metagenomic Sequencing Library Preparation using a dual-indexing strategy, with modifications (36). Briefly, initial PCR reactions (25  $\mu\text{l}$ ) were performed for each sample (including ROC) using 2x Platinum SuperFi PCR Master Mix (Thermo Fisher Scientific), 0.5  $\mu\text{M}$  of forward (5'-**TCGTCGGCAGCGTCAGATGTGTATAAGAGACAGCCTACGGGNGGCWGCAG**-3') and reverse primer (5'-**GTCTCGTGGGCTCGGAGATGTGTATAAGAGACAGGACTACHVGGGTATCTAA**TCC -3') (overhang adapter sequence highlighted in bold) and 4.6 ng of genomic DNA as described at <https://www.protocols.io/view/library-preparation-protocol-to-sequence-v3-v4-reg-6i7hchn>. A 'no template control' (NTC) was included during reaction setup. Cycling conditions were: 98  $^{\circ}\text{C}$  for 30 sec, followed by 25 cycles of 98  $^{\circ}\text{C}$  for 10 sec, 55  $^{\circ}\text{C}$  for 15 sec, and 72  $^{\circ}\text{C}$  for 30 sec, with a final extension of 10 min at 72  $^{\circ}\text{C}$ . PCR products were confirmed by agarose gel electrophoresis before being purified using AMPure XP beads (Beckman Coulter, Indianapolis, IN) at a 1x ratio as described previously (36). Each amplicon was then dual-indexed with unique DNA barcodes using the Nextera XT index kit (N7XX and S5XX, Illumina, San Diego, CA) for PCR-based barcoding (36). For each 50  $\mu\text{l}$  PCR reaction, we used 5  $\mu\text{l}$  of each index (i7 and i5), and 5  $\mu\text{l}$  of the first PCR product. Cycling conditions were as described above but limited to eight cycles. Final libraries (including ROC and NTC) were purified with AMPure XP beads (Beckman Coulter), validated using the TapeStation D1000 high sensitivity assay (Agilent Technologies, Santa

Clara, CA) and the Qubit High Sensitivity dsDNA assay kit (Thermo Fisher Scientific), pooled at equimolar concentrations, and sequenced on an Illumina MiSeq using 600-cycle v3 chemistry (300 bp paired-end) at CSIRO, Black Mountain, Canberra.

Illumina fastq reads were analysed in QIIME 2-2019.7 software (37). Raw fastq reads were quality filtered (i.e. filtered, dereplicated, denoised, merged, and assessed for chimera) to produce amplicon sequence variants (ASV) using the DADA2 pipeline via QIIME2 (38). The DADA2 generated feature table was filtered to remove ASVs at a frequency less than two, and remaining ASVs were aligned against the SILVA\_132 (April, 2018) reference database using QIIME2 feature-classifier BLAST+ (39-41). Fasta sequences from DADA2 were also aligned to the same reference database using BLASTn (2.2.28) through the command line interface (CLI) using an e-value cut-off of 1e-90. We processed and exported BLASTn outputs into QIIME2 to perform taxonomic analysis. All scripts used were deposited at [https://github.com/SomaAnand/Hare\\_rabbit\\_microbiome](https://github.com/SomaAnand/Hare_rabbit_microbiome). Raw sequence data were deposited in the sequence read archive of NCBI under accession number PRJNA576096.

The microbial diversity and richness between hare and rabbit samples were estimated using alpha diversity (Shannon and observed OTU) and beta diversity (Bray-Curtis dissimilarity metric) metrics after rarefaction at a subsampling depth of 149,523 using the q2-diversity pipeline within QIIME2 (42, 43). This subsampling depth retained all samples except for one ROC (rabbit) and PCR NTC, both of which had low sequence counts.

# **Nanopore library preparation, sequencing, and bioinformatics analysis**

The entire 16S rRNA gene (~1500 bp) was targeted for sequencing using the Nanopore MinION sequencing platform. We amplified the 16S rRNA gene from all genomic DNA samples using the universal primers 27F and 1492R [46]. PCR reactions (100 µl) were

performed for each sample using 2x Platinum SuperFi PCR master mix (Thermo Fisher Scientific), 0.4  $\mu$ M each primer, and 11.5 ng genomic DNA as described at <https://www.protocols.io/view/library-preparation-protocol-to-sequence-full-leng-6j6hcre>.

Cycling conditions were: 98 °C for 30 sec, followed by 28 cycles of 98 °C for 10 sec, 55 °C for 15 sec, and 72 °C for 40 sec, with a final extension of 5 min at 72 °C. PCR products were confirmed by agarose gel electrophoresis before being purified with AMPure XP beads (Beckman Coulter), validated using the Tapestation D1000 high sensitivity assay (Agilent Technologies), and quantified using the Qubit High Sensitivity dsDNA assay kit (Thermo Fisher Scientific). For library preparation we used the ligation sequencing kit 1D (SQK-LSK108) in combination with the native barcoding kit 1D (EXP-NBD103) (Oxford Nanopore Technologies, Oxford, UK) as per the manufacturer's protocol, except 500 ng of input DNA per sample was used for end preparation (44). For the addition of barcodes, 80 ng of end-prepped DNA was used as input, and barcoded samples were pooled in equimolar concentrations to obtain at least 400 ng of pooled DNA. We used a final library amount of 200 ng to obtain maximum pore occupancy on a MinION R.9.4.1 flow cell. Two MinION flowcells were used to run all samples and each flow cell had a mix of hare and rabbit samples to control for potential batch effects.

Nanopore raw reads in fast5 format were demultiplexed using deepbiner (45). Basecalling, adapter trimming, and conversion into fastq format was performed in Guppy 2.3.7 (Oxford Nanopore Technologies). BLASTn was used to locally align 16S sequences with a quality score higher than seven against the SILVA\_132 reference database as described above. Top hits were exported in Biological Observation Matrix (BIOM) format and imported into QIIME2 for subsequent analyses. Nanopore data was rarefied at a subsampling depth of 109,435 for diversity analysis. This rarefied dataset was then used to analyse the taxonomic results as per the Illumina workflow described above. Raw sequence

data were deposited in the sequence read archive (SRA) of NCBI under accession number PRJNA576096.

## Statistical analysis

We assessed whether the bacterial diversity of hares and rabbits was statistically different by using permutation-based statistical testing (PERMANOVA) via the QIIME diversity beta-group-significance pipeline within QIIME2 for both Illumina and Nanopore datasets (43). Statistical significance in alpha diversity was estimated using the nonparametric Kruskal Wallis test within QIIME2 (46). We also evaluated statistical differences between hare and rabbit faecal samples for each observed bacterial phyla using a combination of multiple tests. We performed analysis of variance (ANOVA) to estimate the variance of both populations and Student's t-test to identify statistical differences between the means of both groups. Estimated p-values were corrected using the Benjamini-Hochberg method to control the False Discovery Rate for multiple hypothesis testing.

## Results

### Interrogating sympatric hare and rabbit faecal microbiota using 16S rRNA sequencing

We performed Illumina short-read sequencing of the 16S rRNA V3-V4 region and Nanopore long read sequencing of the entire 16S rRNA gene on faecal samples of wild hares and rabbits living sympatrically in a periurban nature reserve in Australia. Short-read sequencing of 24 samples through the Illumina MiSeq pipeline produced an aggregate of 14,559,822 reads greater than Q30 (average 501,908 reads per sample, excluding ROC and NTC). Reads were converted to ASVs, which were assigned using the SILVA\_132 reference database via BLAST+ in QIIME2. This produced 6,662 unique features at a frequency



greater than two. Long-read sequencing of 21 samples (no ROCs or NTC due to lack of amplification) using the Nanopore MinION platform produced an aggregate of 6,544,770 reads (average of 386,924 reads per sample) above a quality threshold of seven across two MinION runs. After aligning the reads against the SILVA\_132 reference database using BLAST, 47,100 unique features with a frequency greater two were obtained.

# **Wild rabbits have greater faecal microbial diversity compared to sympatric hares**

We conducted alpha and beta diversity analyses to assess the species richness and abundance within and between samples, respectively. Rabbit faecal samples had a significantly higher alpha diversity ( $p = 0.0001$  as measured by Shannon index and Kruskal Wallis test) and beta diversity ( $p = 0.01$  as measured by Bray-Curtis dissimilarity matrix and PERMANOVA) than hare samples. We observed considerable variance in faecal microbial diversity between individual rabbits (Fig. 1). In contrast, the hare faecal samples examined had similar bacterial diversity with relatively low variance between individuals. We observed these effects in both the Illumina and Nanopore 16S sequencing data sets (Fig. 1). We did not observe clear correlation between bacterial diversity and sex, reproductive status, or season of sample collection, although our statistical power was low due to the relatively small sample size.

Taxonomic classification of both the Illumina and Nanopore sequencing data sets identified *Firmicutes* and, to a lesser extent *Bacteroidetes*, to be the two dominant phyla in both hare and rabbit faecal samples (Fig. 2). On average, *Firmicutes* and *Bacteroidetes* together comprised more than 85% of the faecal microbiome in hares and rabbits and across both platforms. Hare faecal samples contained a significantly higher ratio of *Firmicutes* to *Bacteroidetes* compared to rabbit faecal samples ( $p = 0.015$  as measured by Student's t-test). In both hare and rabbit faecal samples, *Firmicutes* were predominantly represented by the

families *Ruminococcaceae*, *Christensenellaceae*, *Lachnospiraceae* (genus *Roseburia*),  
*Eubacteriaceae*, and *Erysipelotrichaceae*, while *Bacteroidetes* were predominantly  
represented by the families *Rikenellaceae* and *Barnesiellaceae* (Fig. 3, Fig. S1). Within the  
*Firmicutes* and *Bacteroidetes*, the families *Marinifilaceae* (genera *Odoribacter* and  
*Butyrivibrio*), *Tannerellaceae* (genus *Parabacteroides*), and *Veillonellaceae* were more  
abundant in hares compared to rabbits, while the families *Clostridiaceae* 1, *Enterococcaceae*,  
*Planococcaceae*, *Lactobacillaceae*, *Peptostreptococcaceae*, and *Bacillaceae* were more  
abundant in rabbits, although not all families were present in all rabbits (Fig. 3, Fig. S1).  
Phylum *Tenericutes* (genus *Anaeroplasmataceae*) was present at a significantly higher  
relative frequency in rabbit faecal samples ( $p < 0.01$  as measured by Student's t-test). Phylum  
*Verrucomicrobia* (genus *Akkermansia*) was identified only in rabbit samples and not in hare  
samples, while phyla *Lentisphaerae* (genus *Victivallis*) and *Synergistetes* (genera  
*Pyramidobacter*) were identified only in hare samples. Other phyla such as *Proteobacteria*  
(genus *Sutterella* in both hares and rabbits, family *Desulfovibrionaceae* in hares only, and  
genus *Enterobacter* in rabbits only), *Actinobacteria* (genus *Eggerthellaceae*), and  
*Patescibacteria* (family *Saccharimonadaceae*) were present at low abundance (0.5-3%) in  
both rabbit and hare samples (Fig. 2, Fig. 3, Fig. S1).

The NTC microbiome comprised the phyla *Proteobacteria* and *Bacteroidetes* at  
relative frequencies of 99% and 1%, respectively (Fig. S2). When analysing the ROCs, there  
was obvious genomic DNA contamination of both ROCs, with a number of phyla shared  
between faecal samples and ROCs (Fig. S2). Additional bacterial phyla were also detected  
only in ROCs, likely comprising the “reagent microbiome”, including *Plantomycetes*,  
*Dependentiae*, *Chloroflexi*, and *Chlamydiae*.

## Geography alters the faecal microbiome of wild hares in native and introduced region

We then compared the faecal microbiome of Australian wild hares to that of wild hares in their native range of Europe [24] to investigate the influence of geography on the gastrointestinal microbiome. Strikingly, phylum *Spirochaetes* was the third most abundant phyla in faecal samples of European origin, yet it was completely absent from Australian hares and rabbits (Fig. 4). Furthermore, phylum *Patescibacteria* was below our limit of detection (<0.5% relative abundance) in European hare samples, while in Australian hare samples it was present at a higher relative abundance (1.3%). Other phyla were detected in both European and Australian hare samples at similar relative abundances (Fig. 4).

# **Nanopore and Illumina sequencing platforms reveal a similar faecal microbiome independent of platform**

We observed similar faecal bacterial diversity at the phylum, family, and genus levels in both the Illumina and Nanopore datasets, although the relative abundances varied slightly (Fig. 2, Fig. 3, Fig. S1). Most notably, phyla *Actinobacteria* and *Synergistetes* were present at a higher relative abundance in the Illumina dataset, while phyla *Tenericutes*, *Lentisphaerae*, and to a lesser extent *Cyanobacteria*, were present at higher abundance in the Nanopore dataset (Fig. 2). At the family level, *Thermoanaerobacteraceae*, *Bacteroidaceae*, *Clostridiales vadinBB60* group, and *Atopobiaceae* were detected in the Illumina but not the Nanopore data, while *Muribaculaceae* and *Flavobacteriaceae* were identified only in the Nanopore data (Fig. 3, Fig. S1). Even at the genus level there was generally good agreement between datasets (Fig. 3). However, genera *Butyricimonas*, *Mailhella*, *Ruminococcus 2*, *Erysipelatoclostridium*, and *Sutterella* were only detected in Illumina data and *Parasutterella*, *Schwartzia*, an unassigned *Victivallaceae*, and the *Ruminococcaceae* *NK4A214* group were only identified in the Nanopore data.

## Discussion

To date, studies investigating the gastrointestinal microbial diversity of lagomorphs have been limited to domestic production rabbits in either Europe or China (14-17, 19, 23). Currently only one study has focussed on wild lagomorphs, namely European brown hares in their native European home-range (24). We were interested in understanding why rabbits, an invasive pest species in Australia, were able to rapidly colonise over two thirds of the continent, an area 25 times the size of Britain, within 50 years. In contrast, populations of European brown hares, also a non-native species, remained relatively stable, despite both species occupying a similar ecological niche. Differences in colonising potential of these two species are likely multifactorial, for example, involving differences in behaviour, physiology, and dietary preferences. Comparative analysis of the gastrointestinal microbiome of these two species is one method that can be used to investigate host-specific dietary preferences, which may in turn reveal clues to the differences in environmental impacts that each species has. A secondary aim was to use this study as an opportunity to compare short-read (Illumina) and long-read (Nanopore) sequencing technologies for microbial diversity investigations.

We estimated the gastrointestinal microbiome from faecal samples collected from nine wild European brown hares and twelve European rabbits living sympatrically in their non-native range in Australia. Rabbits had a significantly different faecal microbiome compared to hares and showed greater species richness in their faecal microbiomes and more variation between individuals. Species richness is crucial for imparting resilience to microbial communities, facilitating rapid and effective adaptation to new environmental conditions (47). Species-rich communities can better resist invading pathogens and decreased microbial diversity in humans has been linked to a range of pathologies (47). Hares are known to be more selective foragers than rabbits, which are considered more generalist (7). The observed diversity in the faecal microbiome of wild rabbits may be a consequence of these

indiscriminate dietary preferences, or alternatively, a more diverse faecal microbiome may indeed permit rabbits to consume feeds that hares cannot digest. It is interesting to speculate that the high faecal diversity observed in rabbits may allow them to rapidly adapt to new environments, contributing to this species being such a successful invader.

The faecal microbiomes of both host species were dominated by the phyla *Firmicutes* and *Bacteroidetes*, as is typical for other vertebrate species (48). However, the ratio of *Firmicutes* to *Bacteroidetes* varied, being markedly higher in rabbits compared to hares. In humans, an increased *Firmicutes* to *Bacteroidetes* ratio has notoriously been associated with age, diet, and obesity (49). A higher abundance of *Bacteroidetes* (genus *Bacteroides*) has been linked to consumption of diets rich in protein and fat in humans (50), and indeed, hares are known to prefer diets rich in crude fat and protein (51). Despite having a higher daily digestible nitrogen intake, hares tend to have less efficient protein digestion compared to rabbits, potentially due to the absence of key microbes in their gastrointestinal tract (52). Another apparent difference in the faecal microbiomes of these species was the presence of phylum *Verrucomicrobia* in rabbits. This phylum is dominated by bacteria from the genus *Akkermansia*, which are noted to be positively influenced by dietary polyphenols (53, 54). Polyphenols are metabolised by intestinal bacteria to generate short-chain fatty acids (SCFAs), and previous studies have demonstrated that rabbits produce a higher concentration of SCFAs than hares, with a higher ratio of butyrate to propionate (55-57). Again, it is unknown whether the *Akkermansia* detected in rabbits in this study permit the digestion of these polyphenols, influencing the dietary preference of rabbits, or whether the intake of polyphenols supports a detectable *Akkermansia* population in rabbits.

Phyla *Lentisphaerae* and *Synergistetes* were observed only in hare populations and were dominated by the genera *Victivallis* and *Pyramidobacter*, respectively. Age and diet appear to be important factors in regulating the abundance of these phyla (58, 59). A previous

study in pigs reported a decrease in relative abundance of phyla *Lentisphaerae* and *Synergistetes* with aging (58). Furthermore, lower relative abundances of phyla *Proteobacteria*, *Lentisphaerae*, and *Tenericutes* in vervets and humans have been associated with “Western diets” rich in carbohydrates (59). The observed differences in faecal microbiota could also be related to other known differences in digestive physiology between rabbits and hares. For example, hares have a higher gastrointestinal passage rate compared to rabbits, while rabbits retain digesta longer in order to maximise the efficiency of nutrient extraction (52). Rabbits also have a greater ability to digest hemicelluloses and have a higher rate of methanogenesis compared to hares (55-57, 60).

We also analysed raw data previously sequenced from faecal pellets of wild hares in their native range of Europe to estimate the influence of geography on the gut microbiome (24). We observed the phylum *Spirochaetes* to be the third dominant phyla in the European dataset, in accordance with the original analysis. However, in our Australian dataset only very few reads (less than four) were associated with this phylum. Although bacteria within this phylum can be pathogenic, the *Spirochetes* identified in European hares were associated with a non-pathogenic genus. The absence of this phylum of bacteria in Australian hares may reflect geographical differences in diet between the populations studied, loss of this bacterial species after introduction into Australia, or absence in the original founding hare population. Despite these spirochaetes likely being non-pathogenic, it is worth noting that the absence of pathogens of invasive species in their non-native range may contribute to spread and persistence of these alien species in new environments. Since faecal samples in this study were collected from healthy hares and rabbits, no candidate pathogens were investigated here.

An additional aim of this study was to compare the bacterial diversity between two emerging sequencing platforms. The Illumina platform is a popular approach for 16S rRNA

sequencing, particularly because of its lower error rate (61). However, the short-read length can make species level identification very challenging, especially between closely related species (61). In contrast, the Oxford Nanopore platform has the ability to sequence very long reads, however, it is prone to a relatively high error rate, again making accurate taxonomic assignment challenging (61). In this study, we observed very similar bacterial diversity at the phylum, family, and genus levels with both sequencing platforms, confirming the suitability of either technology for 16S rRNA studies and further confirming the biological relevance of our findings. The minor observed differences in relative abundances of different phyla are most likely due to PCR-based errors or bias, since different primer sets were used for each sequencing platform, or bias during sequencing (61).

In conclusion, we observed notable differences in the microbiome of hares and rabbits living in sympatry in their non-native range in Australia. Though these species inhabit the same habitat, their behaviour and dietary preferences clearly influence differences in faecal bacterial diversity. The more diverse and variable gastrointestinal microbiota of rabbits compared to hares could be a contributing factor in their ability to spread very successfully and establish in new environments. This study also provides additional evidence that the environmental impacts of rabbits are more severe than that of hares, as demonstrated by their less discriminate dietary preferences. Additionally, the absence of bacteria from the phylum *Spirochaetes* in Australian compared to European wild hares demonstrates considerable geographical differences between populations, although whether these spirochetes are beneficial or detrimental to hares was not determined. Future studies correlating different bacterial species in lagomorph microbiomes with particular plant species may provide further insights into the impacts of wild rabbits and hares in Australia.

## Data availability

Detailed protocols are available at <https://www.protocols.io/researchers/somasundhari-shanmuganandam/publications>. All scripts used were deposited at [https://github.com/SomaAnand/Hare\\_rabbit\\_microbiome](https://github.com/SomaAnand/Hare_rabbit_microbiome). Raw Illumina sequence data were deposited in the sequence read archive of NCBI under accession number PRJNA576096 and Nanopore data were deposited under accession number PRJNA576096.

## References

1. Čuda J, Skálová H, Janovský Z, Pyšek P. 2015. Competition among native and invasive *Impatiens* species: the roles of environmental factors, population density and life stage. *AoB PLANTS* 7.
2. Shine R. 2010. The ecological impact of invasive cane toads (*Bufo marinus*) in Australia. *Q Rev Biol* 85:253-291.
3. Stott P. 2003. Use of space by sympatric European hares (*Lepus europaeus*) and European rabbits (*Oryctolagus cuniculus*) in Australia. *Mamm Biol* 68:317-327.
4. Zenger KR, Richardson BJ, Vachot-Griffin A-M. 2003. A rapid population expansion retains genetic diversity within European rabbits in Australia. *Mol Ecol* 12:789-794.
5. Bird P, Mutze G, Peacock D, Jennings S. 2012. Damage caused by low-density exotic herbivore populations: The impact of introduced European rabbits on marsupial herbivores and *Allocasuarina* and *Bursaria* seedling survival in Australian coastal shrubland. *Biol Invasions* 14:743-755.
6. Department of the Environment and Energy. 2016. Threat abatement plan for competition and land degradation by rabbits.



- 387 [https://www.environment.gov.au/biodiversity/threatened/publications/tap/competition-and-](https://www.environment.gov.au/biodiversity/threatened/publications/tap/competition-and-land-degradation-rabbits-2016)
- 388 [land-degradation-rabbits-2016](https://www.environment.gov.au/biodiversity/threatened/publications/tap/competition-and-land-degradation-rabbits-2016). Accessed 16 July 2019.
- 389 7. Chapuis J. 1990. Comparison of the diets of two sympatric lagomorphs, *Lepus europaeus*
- 390 *Pallas* and *Oryctolagus cuniculus*. Z Säugetierkunde 55:176-185.
- 391 8. David LA, Maurice CF, Carmody RN, Gootenberg DB, Button JE, Wolfe BE, Ling AV,
- 392 Devlin AS, Varma Y, Fischbach MA, Biddinger SB, Dutton RJ, Turnbaugh PJ. 2013. Diet
- 393 rapidly and reproducibly alters the human gut microbiome. Nature 505:559-563.
- 394 9. Henderson G, Cox F, Ganesh S, Jonker A, Young W, Global Rumen Census C, Abecia L,
- 395 Angarita E, Aravena P, Nora Arenas G, Ariza C, Attwood GT, Mauricio Avila J, Avila-
- 396 Stagno J, Bannink A, Barahona R, Batistotti M, Bertelsen MF, Brown-Kav A, Carvajal AM,
- 397 Cersosimo L, Vieira Chaves A, Church J, Clipson N, Cobos-Peralta MA, Cookson AL,
- 398 Cravero S, Cristobal Carballo O, Crosley K, Cruz G, Cerón Cucchi M, de la Barra R, De
- 399 Menezes AB, Detmann E, Dieho K, Dijkstra J, dos Reis WLS, Dugan MER, Hadi Ebrahimi
- 400 S, Eythórsdóttir E, Nde Fon F, Fraga M, Franco F, Friedeman C, Fukuma N, Gagić D,
- 401 Gangnat I, Javier Grilli D, Guan LL, Heidarian Miri V, et al. 2015. Rumen microbial
- 402 community composition varies with diet and host, but a core microbiome is found across a
- 403 wide geographical range. Sci Rep 5:14567.
- 404 10. Clemente Jose C, Ursell Luke K, Parfrey Laura W, Knight R. 2012. The impact of the gut
- 405 microbiota on human health: An integrative view. Cell 148:1258-1270.
- 406 11. McKenna P, Hoffmann C, Minkah N, Aye PP, Lackner A, Liu Z, Lozupone CA, Hamady M,
- 407 Knight R, Bushman FD. 2008. The macaque gut microbiome in health, lentiviral infection,
- 408 and chronic enterocolitis. PLOS Pathogens 4:e20.
- 409 12. Turnbaugh PJ, Ley RE, Hamady M, Fraser-Liggett CM, Knight R, Gordon JI. 2007. The
- 410 human microbiome project. Nature 449:804-810.
- 411 13. Alcock J, Maley CC, Aktipis CA. 2014. Is eating behavior manipulated by the gastrointestinal
- 412 microbiota? Evolutionary pressures and potential mechanisms. BioEssays 36:940-949.

- 413 14. Eshar D, Weese JS. 2014. Molecular analysis of the microbiota in hard feces from healthy  
414 rabbits (*Oryctolagus cuniculus*) medicated with long term oral meloxicam. BMC Vet Res  
415 10:62.
- 416 15. Zeng B, Han S, Wang P, Wen B, Jian W, Guo W, Yu Z, Du D, Fu X, Kong F, Yang M, Si X,  
417 Zhao J, Li Y. 2015. The bacterial communities associated with fecal types and body weight of  
418 rex rabbits. Sci Rep 5:9342-9342.
- 419 16. Kylie J, Weese JS, Turner PV. 2018. Comparison of the fecal microbiota of domestic  
420 commercial meat, laboratory, companion, and shelter rabbits (*Oryctolagus cuniculi*). BMC  
421 Vet Res 14:143.
- 422 17. Velasco-Galilea M, Piles M, Viñas M, Rafel O, González-Rodríguez O, Guivernau M,  
423 Sánchez JP. 2018. Rabbit microbiota changes throughout the intestinal tract. Front Microbiol  
424 9:2144.
- 425 18. Reddivari L, Veeramachaneni DNR, Walters WA, Lozupone C, Palmer J, Hewage MKK,  
426 Bhatnagar R, Amir A, Kennett MJ, Knight R, Vanamala JKP. 2017. Perinatal bisphenol A  
427 exposure induces chronic inflammation in rabbit offspring via modulation of gut bacteria and  
428 their metabolites. mSystems 2:e00093-17.
- 429 19. Xing Y, Liu J, Lu F, Wang L, Li Y, Ouyang C. 2019. Dynamic distribution of gallbladder  
430 microbiota in rabbit at different ages and health states. PLOS ONE 14:e0211828.
- 431 20. Dabbou S, Ferrocino I, Kovitvadhi A, Bergagna S, Dezzuto D, Schiavone A, Cocolin L, Gai  
432 F, Santoro V, Gasco L. 2019. Bilberry pomace in rabbit nutrition: effects on growth  
433 performance, apparent digestibility, caecal traits, bacterial community and antioxidant status.  
434 Animal 13:53-63.
- 435 21. Xing Y-W, Lei G-T, Wu Q-H, Jiang Y, Huang M-X. 2019. Procyanidin B2 protects against  
436 diet-induced obesity and non-alcoholic fatty liver disease via the modulation of the gut  
437 microbiota in rabbits. World J Gastroentero 25:955-966.
- 438 22. O' Donnell MM, Harris HMB, Ross RP, O'Toole PW. 2017. Core fecal microbiota of  
439 domesticated herbivorous ruminant, hindgut fermenters, and monogastric animals.  
440 MicrobiologyOpen 6:e00509.

- 441 23. Crowley EJ, King JM, Wilkinson T, Worgan HJ, Huson KM, Rose MT, McEwan NR. 2017.  
442 Comparison of the microbial population in rabbits and guinea pigs by next generation  
443 sequencing. PLOS ONE 12:e0165779.
- 444 24. Stalder GL, Pinior B, Zwirzitz B, Loncaric I, Jakupović D, Vetter SG, Smith S, Posautz A,  
445 Hoelzl F, Wagner M, Hoffmann D, Kübber-Heiss A, Mann E. 2019. Gut microbiota of the  
446 European brown hare (*Lepus europaeus*). Sci Rep 9:2738.
- 447 25. Redford KH, Segre JA, Salafsky N, del Rio CM, McAloose D. 2012. Conservation and the  
448 microbiome. Conserv Biol 26:195-197.
- 449 26. Gong B, Cao H, Peng C, Perčulija V, Tong G, Fang H, Wei X, Ouyang S. 2019. High-  
450 throughput sequencing and analysis of microbial communities in the mangrove swamps along  
451 the coast of Beibu Gulf in Guangxi, China. Sci Rep 9:9377.
- 452 27. Wei Y-J, Wu Y, Yan Y-Z, Zou W, Xue J, Ma W-R, Wang W, Tian G, Wang L-Y. 2018.  
453 High-throughput sequencing of microbial community diversity in soil, grapes, leaves, grape  
454 juice and wine of grapevine from China. PLOS ONE 13:e0193097.
- 455 28. Jackson CR, Randolph KC, Osborn SL, Tyler HL. 2013. Culture dependent and independent  
456 analysis of bacterial communities associated with commercial salad leaf vegetables. BMC  
457 Microbiol 13:274.
- 458 29. Stefani FOP, Bell TH, Marchand C, de la Providencia IE, El Yassimi A, St-Arnaud M, Hijri  
459 M. 2015. Culture-dependent and -independent methods capture different microbial  
460 community fractions in hydrocarbon-contaminated soils. PLOS ONE 10:e0128272.
- 461 30. Öztürk B, de Jaeger L, Smidt H, Sipkema D. 2013. Culture-dependent and independent  
462 approaches for identifying novel halogenases encoded by *Crambe crambe* (marine sponge)  
463 microbiota. Sci Rep 3:2780.
- 464 31. Adewumi G, Oguntoyinbo F, Keisam S, Jeyaram K. 2013. Combination of culture-  
465 independent and culture-dependent molecular methods for the determination of bacterial  
466 community of iru, a fermented *Parkia biglobosa* seeds. Front Microbiol 3:436.

- 467 32. Ranjan R, Rani A, Metwally A, McGee HS, Perkins DL. 2016. Analysis of the microbiome:  
468 Advantages of whole genome shotgun versus 16S amplicon sequencing. *Biochem Bioph Res*  
469 *Co* 469:967-977.
- 470 33. Schadt EE, Turner S, Kasarskis A. 2010. A window into third-generation sequencing. *Hum*  
471 *Mol Genet* 19:227-240.
- 472 34. Lee H, Gurtowski J, Yoo S, Nattestad M, Marcus S, Goodwin S, Richard McCombie W,  
473 Schatz MC. 2016. Third-generation sequencing and the future of genomics. *bioRxiv*  
474 doi:10.1101/048603:048603.
- 475 35. Shin J, Lee S, Go M-J, Lee SY, Kim SC, Lee C-H, Cho B-K. 2016. Analysis of the mouse gut  
476 microbiome using full-length 16S rRNA amplicon sequencing. *Sci Rep* 6:29681.
- 477 36. Illumina. 2013. 16s metagenomic sequencing library preparation.  
478 [http://sapac.support.illumina.com/content/dam/illumina-](http://sapac.support.illumina.com/content/dam/illumina-support/documents/documentation/chemistry_documentation/16s/16s-metagenomic-library-prep-guide-15044223-b.pdf)  
479 [support/documents/documentation/chemistry\\_documentation/16s/16s-metagenomic-library-](http://sapac.support.illumina.com/content/dam/illumina-support/documents/documentation/chemistry_documentation/16s/16s-metagenomic-library-prep-guide-15044223-b.pdf)  
480 [prep-guide-15044223-b.pdf](http://sapac.support.illumina.com/content/dam/illumina-support/documents/documentation/chemistry_documentation/16s/16s-metagenomic-library-prep-guide-15044223-b.pdf). Accessed 5 July 2019.
- 481 37. Bolyen E, Rideout JR, Dillon MR, Bokulich NA, Abnet C, Al-Ghalith GA, Alexander H, Alm  
482 EJ, Arumugam M, Asnicar F. 2019. Reproducible, interactive, scalable and extensible  
483 microbiome data science using QIIME 2. *Nat Biotechnol* 37:852-857.
- 484 38. Callahan BJ, McMurdie PJ, Rosen MJ, Han AW, Johnson AJA, Holmes SP. 2016. DADA2:  
485 High-resolution sample inference from Illumina amplicon data. *Nat Methods* 13:581-583.
- 486 39. Bokulich NA, Kaehler BD, Rideout JR, Dillon M, Bolyen E, Knight R, Huttley GA, Gregory  
487 Caporaso J. 2018. Optimizing taxonomic classification of marker-gene amplicon sequences  
488 with QIIME 2's q2-feature-classifier plugin. *Microbiome* 6:90.
- 489 40. Camacho C, Coulouris G, Avagyan V, Ma N, Papadopoulos J, Bealer K, Madden TL. 2009.  
490 BLAST+: architecture and applications. *BMC Bioinformatics* 10:421.
- 491 41. Quast C, Pruesse E, Yilmaz P, Gerken J, Schweer T, Yarza P, Peplies J, Glöckner FO. 2013.  
492 The SILVA ribosomal RNA gene database project: improved data processing and web-based  
493 tools. *Nucleic Acids Res* 41:590-596.

- 494 42. Faith DP, Minchin PR, Belbin L. 1987. Compositional dissimilarity as a robust measure of  
495 ecological distance. *Vegetatio* 69:57-68.
- 496 43. Anderson MJ. 2001. A new method for non-parametric multivariate analysis of variance.  
497 *Austral Ecology* 26:32-46.
- 498 44. Hu Y, Schwessinger B. 2018. Amplicon sequencing using MinION optimized from 1D native  
499 barcoding genomic DNA. protocols io doi:dx.doi.org/10.17504/protocols.io.mhkc34w.
- 500 45. Wick RR, Judd LM, Holt KE. 2018. Deepbiner: Demultiplexing barcoded Oxford Nanopore  
501 reads with deep convolutional neural networks. *PLOS Comp Biol* 14:e1006583.
- 502 46. Kruskal WH, Wallis WA. 1952. Use of Ranks in One-Criterion Variance Analysis. *Journal of*  
503 *the American Statistical Association* 47:583-621.
- 504 47. Lozupone CA, Stombaugh JI, Gordon JI, Jansson JK, Knight R. 2012. Diversity, stability and  
505 resilience of the human gut microbiota. *Nature* 489:220-230.
- 506 48. Eckburg PB, Bik EM, Bernstein CN, Purdom E, Dethlefsen L, Sargent M, Gill SR, Nelson  
507 KE, Relman DA. 2005. Diversity of the human intestinal microbial flora. *Science* 308:1635-  
508 1638.
- 509 49. Ley RE, Turnbaugh PJ, Klein S, Gordon JI. 2006. Human gut microbes associated with  
510 obesity. *Nature* 444:1022-1023.
- 511 50. Wu GD, Chen J, Hoffmann C, Bittinger K, Chen Y-Y, Keilbaugh SA, Bewtra M, Knights D,  
512 Walters WA, Knight R, Sinha R, Gilroy E, Gupta K, Baldassano R, Nessel L, Li H, Bushman  
513 FD, Lewis JD. 2011. Linking long-term dietary patterns with gut microbial enterotypes.  
514 *Science* 334:105-108.
- 515 51. Schai-Braun SC, Reichlin TS, Ruf T, Klansek E, Tataruch F, Arnold W, Hackländer K. 2015.  
516 The European hare (*Lepus europaeus*): a picky herbivore searching for plant parts rich in fat.  
517 *PLOS ONE* 10:e0134278.
- 518 52. Kuijper D, Van Wieren S, Bakker J. 2004. Digestive strategies in two sympatrically occurring  
519 lagomorphs. *J Zool* 264:171-178.

- 520 53. Roopchand DE, Carmody RN, Kuhn P, Moskal K, Rojas-Silva P, Turnbaugh PJ, Raskin I.  
521 2015. Dietary polyphenols promote growth of the gut bacterium *Akkermansia muciniphila*  
522 and attenuate high-fat diet-induced metabolic syndrome. *Diabetes* 64:2847-2858.
- 523 54. Anhê FF, Pilon G, Roy D, Desjardins Y, Levy E, Marette A. 2016. Triggering *Akkermansia*  
524 with dietary polyphenols: A new weapon to combat the metabolic syndrome? *Gut Microbes*  
525 7:146-153.
- 526 55. Mišta D, Króliczewska B, Marounek M, Pecka E, Zawadzki W, Nicpoń J. 2015. *In vitro*  
527 study and comparison of caecal methanogenesis and fermentation pattern in the brown hare  
528 (*Lepus europaeus*) and domestic rabbit (*Oryctolagus cuniculus*). *PLOS ONE* 10:e0117117.
- 529 56. Marounek M, Brezina P, Baran M. 2000. Fermentation of carbohydrates and yield of  
530 microbial protein in mixed cultures of rabbit caecal microorganisms. *Arch Tierernähr* 53:241-  
531 252.
- 532 57. Mišta D, Króliczewska B, Pecka-Kiełb E, Piekarska J, Marounek M, Zawadzki W. 2018.  
533 Comparative in vitro study of caecal microbial activity in brown hares and domestic rabbits  
534 which were offered the same diet. *Mammal Res* 63:285-296.
- 535 58. Niu Q, Li P, Hao S, Zhang Y, Kim SW, Li H, Ma X, Gao S, He L, Wu W, Huang X, Hua J,  
536 Zhou B, Huang R. 2015. Dynamic distribution of the gut microbiota and the relationship with  
537 apparent crude fiber digestibility and growth stages in pigs. *Sci Rep* 5:9938.
- 538 59. Amato KR, Yeoman CJ, Cerda G, A. Schmitt C, Cramer JD, Miller MEB, Gomez A, R.  
539 Turner T, Wilson BA, Stumpf RM, Nelson KE, White BA, Knight R, Leigh SR. 2015.  
540 Variable responses of human and non-human primate gut microbiomes to a Western diet.  
541 *Microbiome* 3:53.
- 542 60. Stott P. 2008. Comparisons of digestive function between the European hare (*Lepus*  
543 *europaeus*) and the European rabbit (*Oryctolagus cuniculus*): Mastication, gut passage, and  
544 digestibility. *Mamm Biol* 73:276-286.
- 545 61. Pollock J, Glendinning L, Wisedchanwet T, Watson M. 2018. The madness of microbiome:  
546 Attempting to find consensus "best practice" for 16S microbiome studies. *Appl Environ*  
547 *Microbiol* 84: e02627.



## 549 Tables and Figures

550 **Table S1: Metadata for hare and rabbit samples used in this study**

| Sample    | Sample name | Sex* | Weight (g)^ | Collection month | Lactation status    |
|-----------|-------------|------|-------------|------------------|---------------------|
| Hare 1    | MF-136      | NA   | NA          | January          | No                  |
| Hare 2    | MF-148      | F    | 3100        | May              | No                  |
| Hare 3    | MF-149      | M    | 3700        | May              | No                  |
| Hare 4    | MF-150      | M    | 3040        | June             | No                  |
| Hare 5    | MF-151      | M    | 2920        | June             | No                  |
| Hare 6    | MF-152      | F    | 3460        | June             | No                  |
| Hare 7    | MF-155      | F    | 3250        | July             | No                  |
| Hare 8    | MF-156      | F    | 3350        | July             | No                  |
| Hare 9    | MF-157      | F    | 4900        | September        | Pregnant, lactating |
| Rabbit 1  | MF-138      | F    | NA          | February         | Pregnant, lactating |
| Rabbit 2  | MF-139      | M    | 1080        | March            | No                  |
| Rabbit 3  | MF-140      | F    | 960         | March            | No                  |
| Rabbit 4  | MF-141      | F    | 1380        | March            | Yes                 |
| Rabbit 5  | MF-142      | F    | 1440        | March            | Yes                 |
| Rabbit 6  | MF-143      | NA   | 400^        | March            | No                  |
| Rabbit 7  | MF-144      | M    | 1400        | March            | No                  |
| Rabbit 8  | MF-145      | F    | 1500        | March            | Pregnant, lactating |
| Rabbit 9  | MF-146      | F    | NA          | April            | Pregnant, lactating |
| Rabbit 10 | MF-147      | F    | NA          | April            | No                  |



|           |        |   |      |      |    |
|-----------|--------|---|------|------|----|
| Rabbit 11 | MF-153 | M | 1500 | June | No |
| Rabbit 12 | MF-154 | M | 1400 | June | No |

551 \* F female; M male; NA not recorded

552 ^ young rabbit (<12 weeks old)

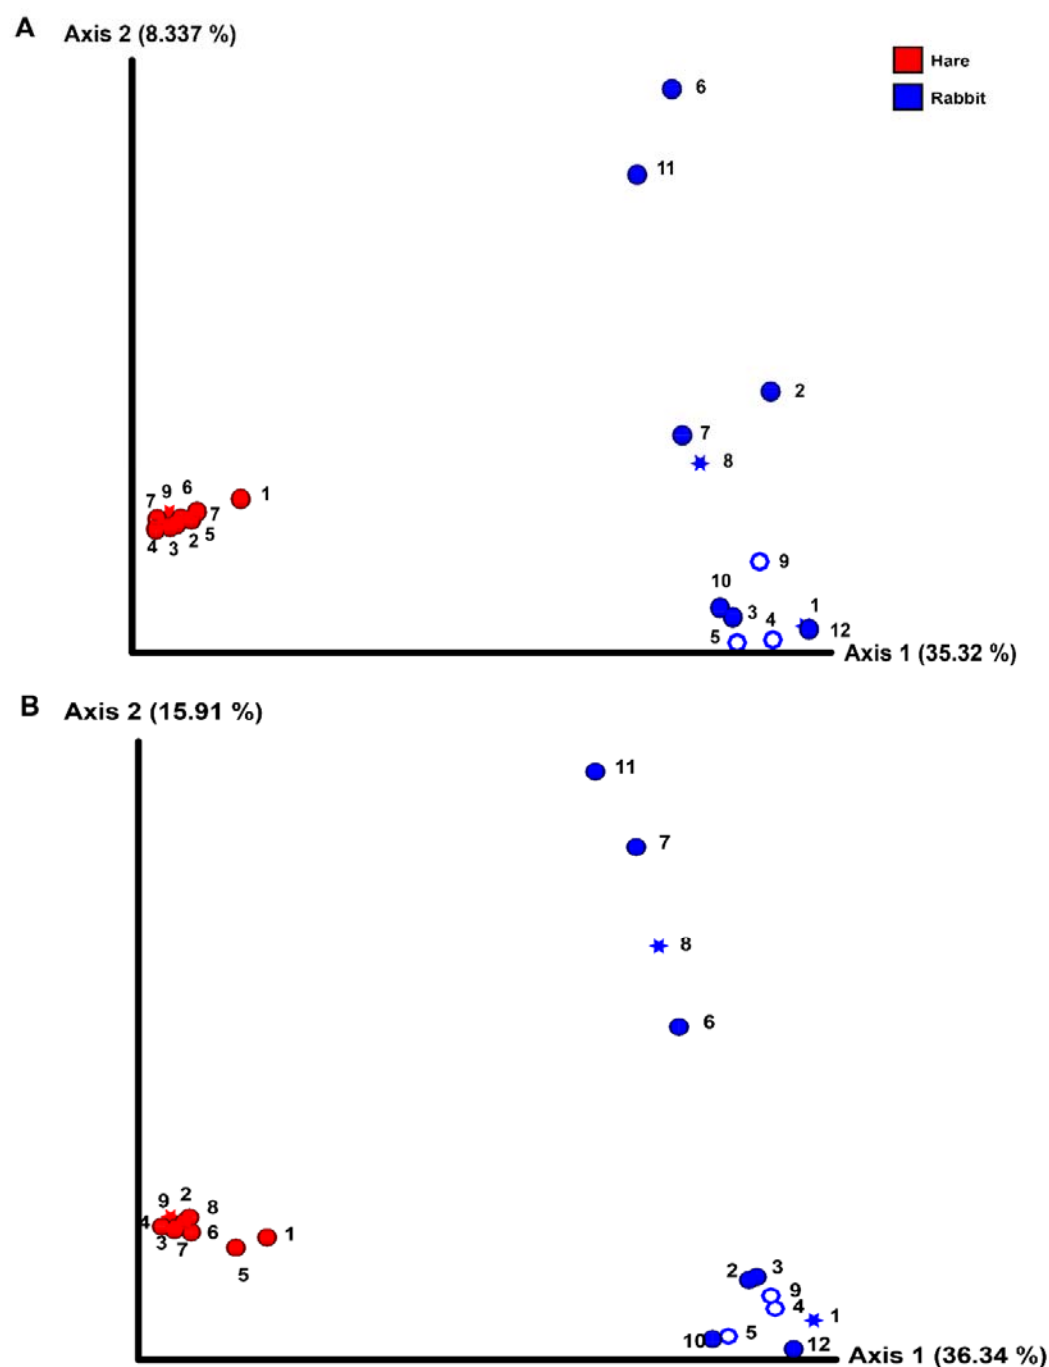

**Figure 1: Wild rabbits have greater faecal microbial diversity than sympatric wild**

**hares.** 16S rRNA profiling was conducted on wild hare and rabbit faecal samples using either (A) Illumina, or (B) Nanopore sequencing platforms. Microbial species richness and abundance (beta diversity) was estimated using a Bray-Curtis dissimilarity matrix.

Significance was assessed using PERMANOVA. Numbers refer to individual animal identifiers as described in Table S1. Stars symbolises pregnant and lactating females, open circles symbolise lactating females, and closed circles symbolise non-pregnant and non-lactating animals.

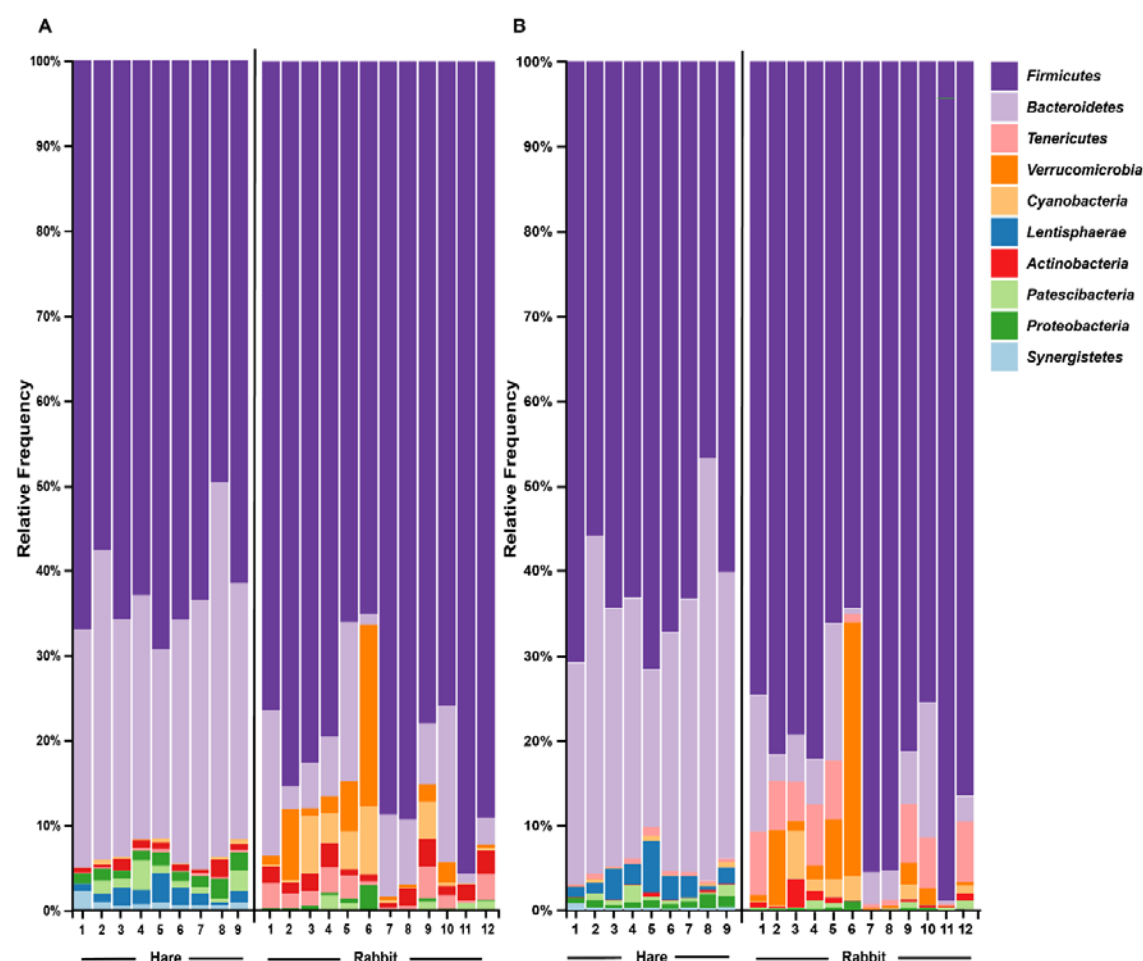

**Figure 2: The faecal microbiomes of wild rabbits and hares were distinct at phylum level.** Taxonomic classification of 16S rRNA sequences from (A) Illumina, and (B) Nanopore sequencing platforms was performed using BLASTn against the SILVA\_132 reference database. The relative frequency of reads assigned to bacterial phyla present at an abundance greater than 0.5% were plotted for each sample.

569

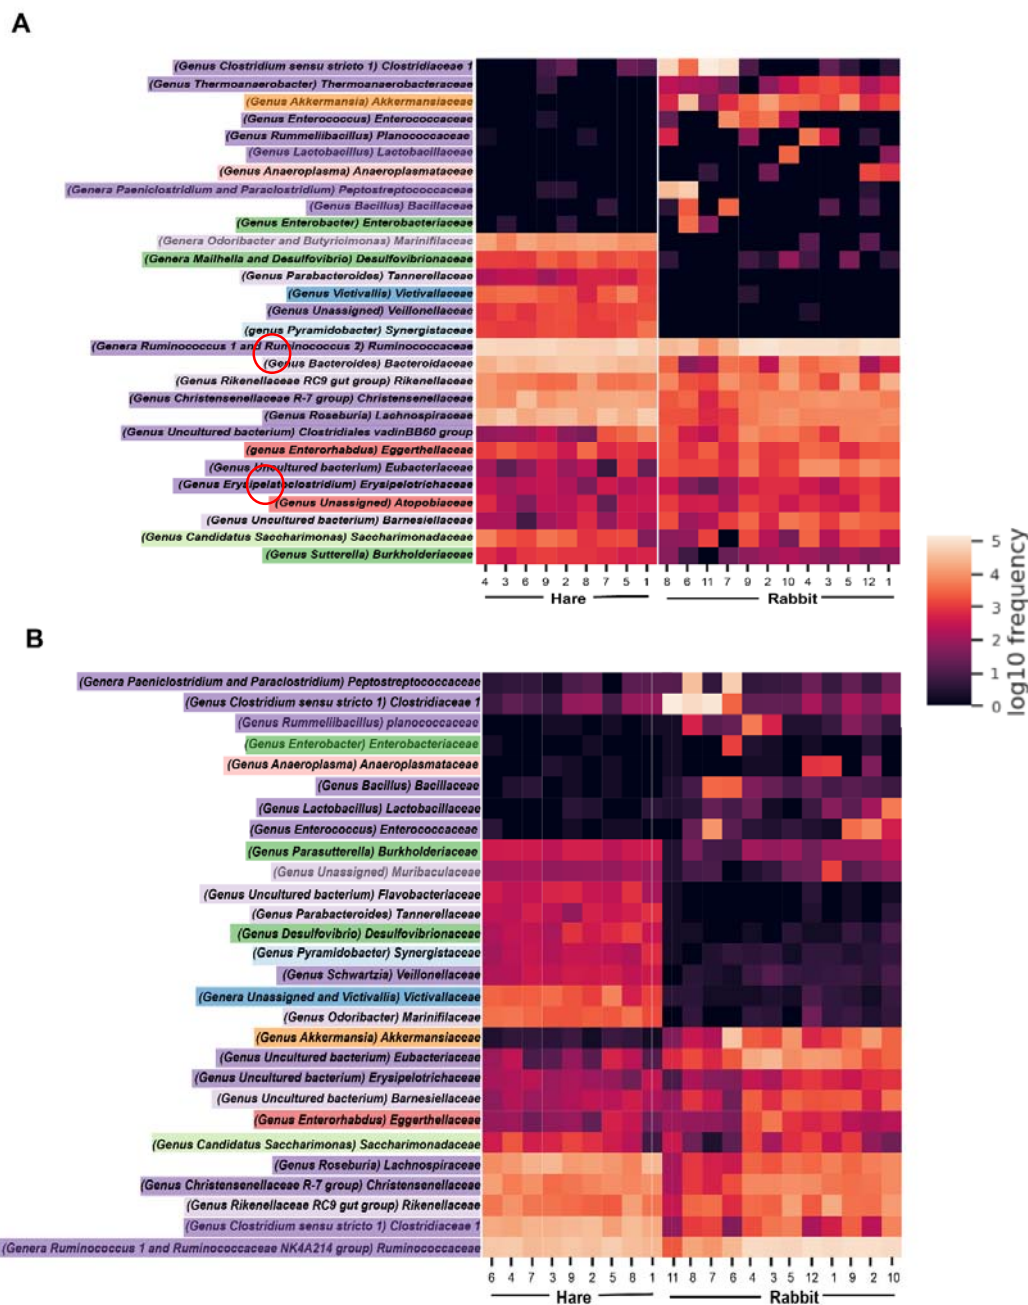

570

571 **Figure 3: Faecal microbial diversity of Australian wild hares and rabbits at the family**  
 572 **level identified unique profiles for wild hares and rabbits.** Taxonomic classification of  
 573 16S rRNA sequences from (A) Illumina, and (B) Nanopore platforms was performed using

574 BLASTn against the SILVA\_132 reference database. The frequency of reads mapping to  
575 bacterial families for individual samples are shown in a heatmap on a log10 scale. Family and  
576 genera names are highlighted according to phylum. Rows are clustered based on features  
577 identified across all samples. Bacterial families present at a frequency less than 0.5% are not  
578 included.

579

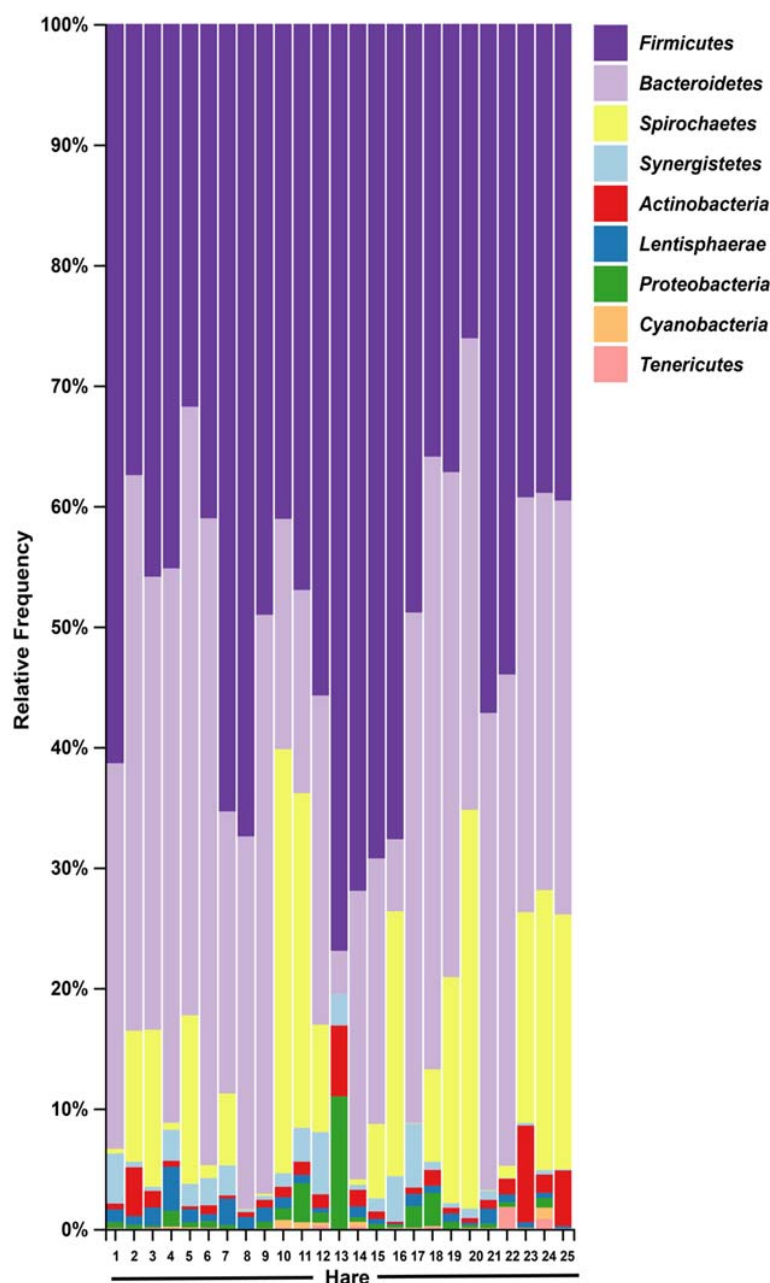

580

581 **Figure 4: Faecal microbial diversity of wild hares in their native range of Europe shows**  
582 ***Spirochaetes* to be the third most abundant bacterial phyla.** Raw Illumina sequencing data  
583 were obtained from a previous study examining the 16S rRNA diversity in faecal pellets of  
584 European brown hares in Europe (24). Reads were processed and classified in parallel with  
585 sequencing data from Australia hare faecal samples, using BLASTn against the SILVA\_132

reference database. The relative frequency of reads assigned to bacterial phyla present at an abundance greater than 0.5% were plotted for each sample.

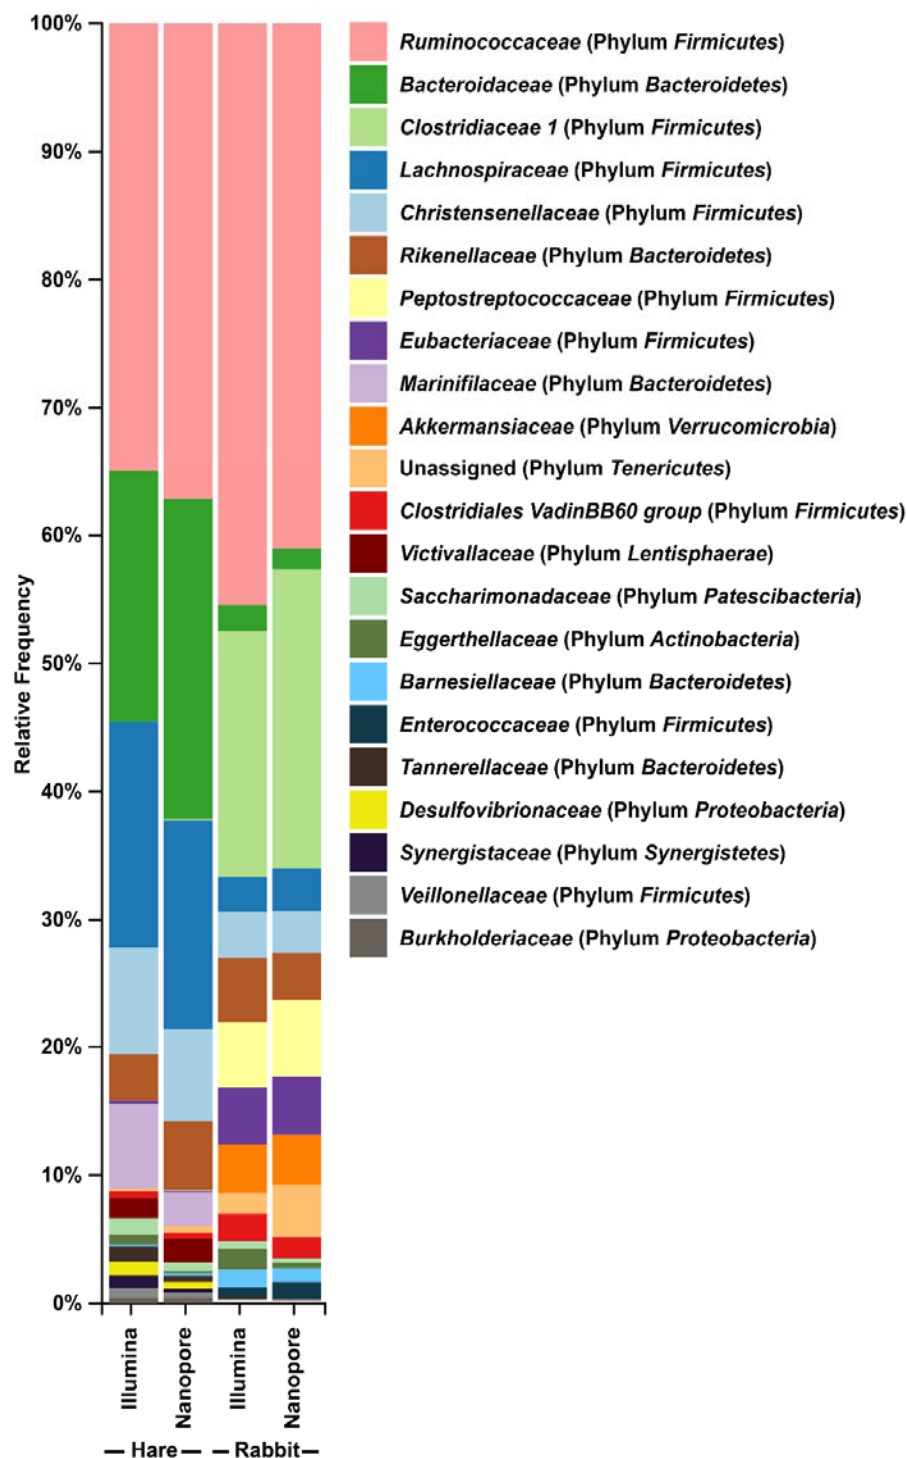

588

589 **Supplementary Figure 1: Illumina and Nanopore sequencing platforms produced very**  
590 **similar distributions of bacterial families in wild hare and rabbit faecal samples.**  
591 Taxonomic classification of 16S rRNA sequences from (A) Illumina, and (B) Nanopore  
592 sequencing platforms was performed using BLASTn against the SILVA\_132 reference  
593 database. Bacterial families present at a relative frequency less than 0.5% are not included.



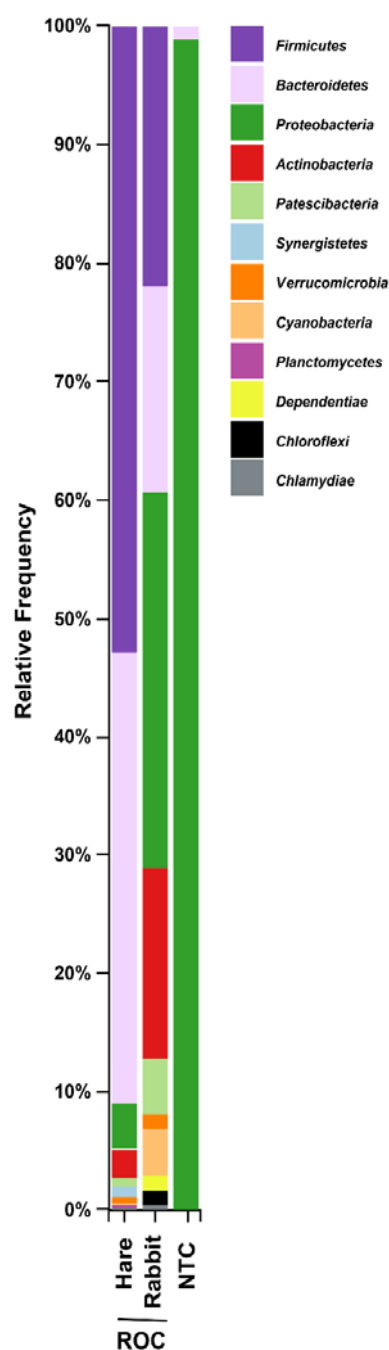

594

595 **Supplementary Figure 2: Taxonomic bar plot at phyla rank showing bacterial**  
596 **composition across ROC and NTC samples.** Reagent-only controls (ROCs) were extracted  
597 and processed in parallel with genomic DNA from faecal pellets. The no template control  
598 (NTC) was included in 16S rRNA PCRs and subsequently processed in parallel with samples.

599 Samples were sequenced using the Illumina platform. Taxonomic classification of reads was  
600 performed using BLASTn against the SILVA\_132 reference database. Bacterial phyla  
601 present at a relative frequency less than 0.5% are not included.
